# Supplementary material for: Dynamic monitoring and proactive fouling management in a pilot scale gas-sparged anaerobic membrane bioreactor
Source: Royal Society of Chemistry journal article supplement (doi:10.1039/d0ew00608d), 2020-01-01
Supplement: d0ew00608d1.pdf [file d0ew00608d1.pdf]

### Supplementary Information

**Table S.1.** The typical maintenance cleaning procedure used in this study. For back-to-back cleans, this procedure is repeated once for each chemical

|             | Maintenance Clean Procedure | Time (s) | Action                                                                                                            |
|-------------|-----------------------------|----------|-------------------------------------------------------------------------------------------------------------------|
|             | Membrane relaxation         | 300      | Permeation is paused, biogas sparging continues                                                                   |
|             | Chemical backpulse          | 120      | Biogas sparging and pump recirculation are paused, permeate pump is reversed and chemical is backpulsed at 20 LMH |
|             | Membrane relaxation         | 300      | Permeate pump is paused                                                                                           |
| 5<br>Cycles | Chemical backpulse cycle    | 30       | Permeate pump backpulses chemical at 20 LMH                                                                       |
|             | Membrane relaxation cycle   | 270      | Permeate pump is paused                                                                                           |
|             | Clean water Backpulse       | 120      | Permeate pump backpulses water at 20 LMH                                                                          |
|             | Membrane relaxation         | 60       | Permeate pump is paused                                                                                           |
|             | Biogas Sparge               | 300      | Biogas sparging is resumed                                                                                        |

**Table S.2.** The recovery cleaning procedure used in this study. This procedure was repeated once for each chemical.

|                                                 | <b>Recovery Clean Procedure</b>  | <b>Time</b> | <b>Action</b>                                                                                           |
|-------------------------------------------------|----------------------------------|-------------|---------------------------------------------------------------------------------------------------------|
|                                                 | Membrane relaxation              | 5 min       | Permeation is paused, biogas sparging at 50 SLPM, pump recirculation continues                          |
|                                                 | Drain membrane tank              | N/A         | Biogas sparging and pump recirculation are paused, drain the membrane tank's contents to the waste line |
|                                                 | Fill membrane tank with permeate | N/A         | Backpulse membrane tank until filled with 110 L of permeate                                             |
|                                                 | Biogas Sparge                    | 5 min       | Permeate backpulse is paused, biogas sparging is resumed                                                |
|                                                 | Drain membrane tank              | N/A         | Biogas sparging is paused, drain the membrane tank to the waste line                                    |
| Repeat until 90% of the membrane tank is filled | Chemical backpulse cycle         | 2 min       | Permeate pump backpulses chemical at 33 LMH                                                             |
|                                                 | Membrane relaxation cycle        | 2 min       | Permeate pump is paused                                                                                 |
|                                                 | Chemical soak: NaOCl             | 4 min       | Permeate pump remains paused for 4 minutes after the final cycle                                        |
|                                                 | Drain 30% of the membrane tank   | N/A         | Drain the 30% of the membrane tank's total volume to the waste line                                     |
| Repeat until 90% of the membrane tank is filled | Chemical backpulse cycle         | 2 min       | Permeate pump backpulses chemical at 33 LMH                                                             |
|                                                 | Membrane relaxation cycle        | 2 min       | Permeate pump is paused                                                                                 |
|                                                 | Chemical soak                    | 4 min       | Permeate pump remains paused for 4 minutes after the final cycle                                        |
|                                                 | Drain 30% of the membrane tank   | N/A         | Drain the 30% of the membrane tank's total volume to the waste line                                     |
|                                                 | Fill membrane tank with permeate | N/A         | Backpulse permeate at 33 LMH until membrane tank is full, diluting the dosed cleaning chemical          |
|                                                 | Chemical soak                    | 6 h         | Allow membrane to soak in residual chemical                                                             |
|                                                 | Drain membrane tank              | N/A         | Drain the membrane tank's contents to the waste line                                                    |

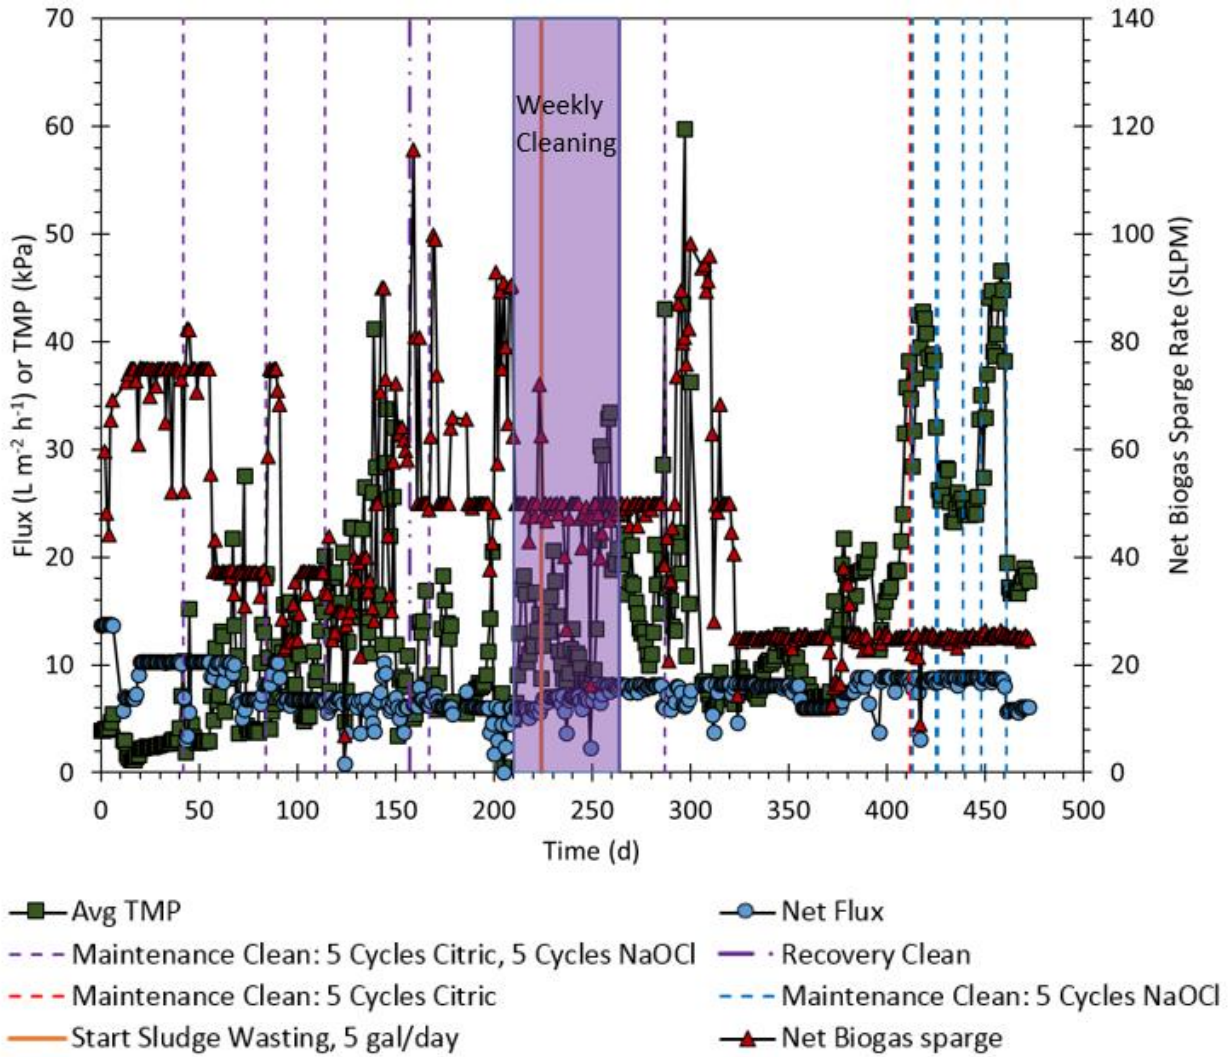

**Figure S1.** A plot of transmembrane pressure, flux, net biogas sparge flowrate, chemical cleaning events, and sludge wasting over the study's entire duration.

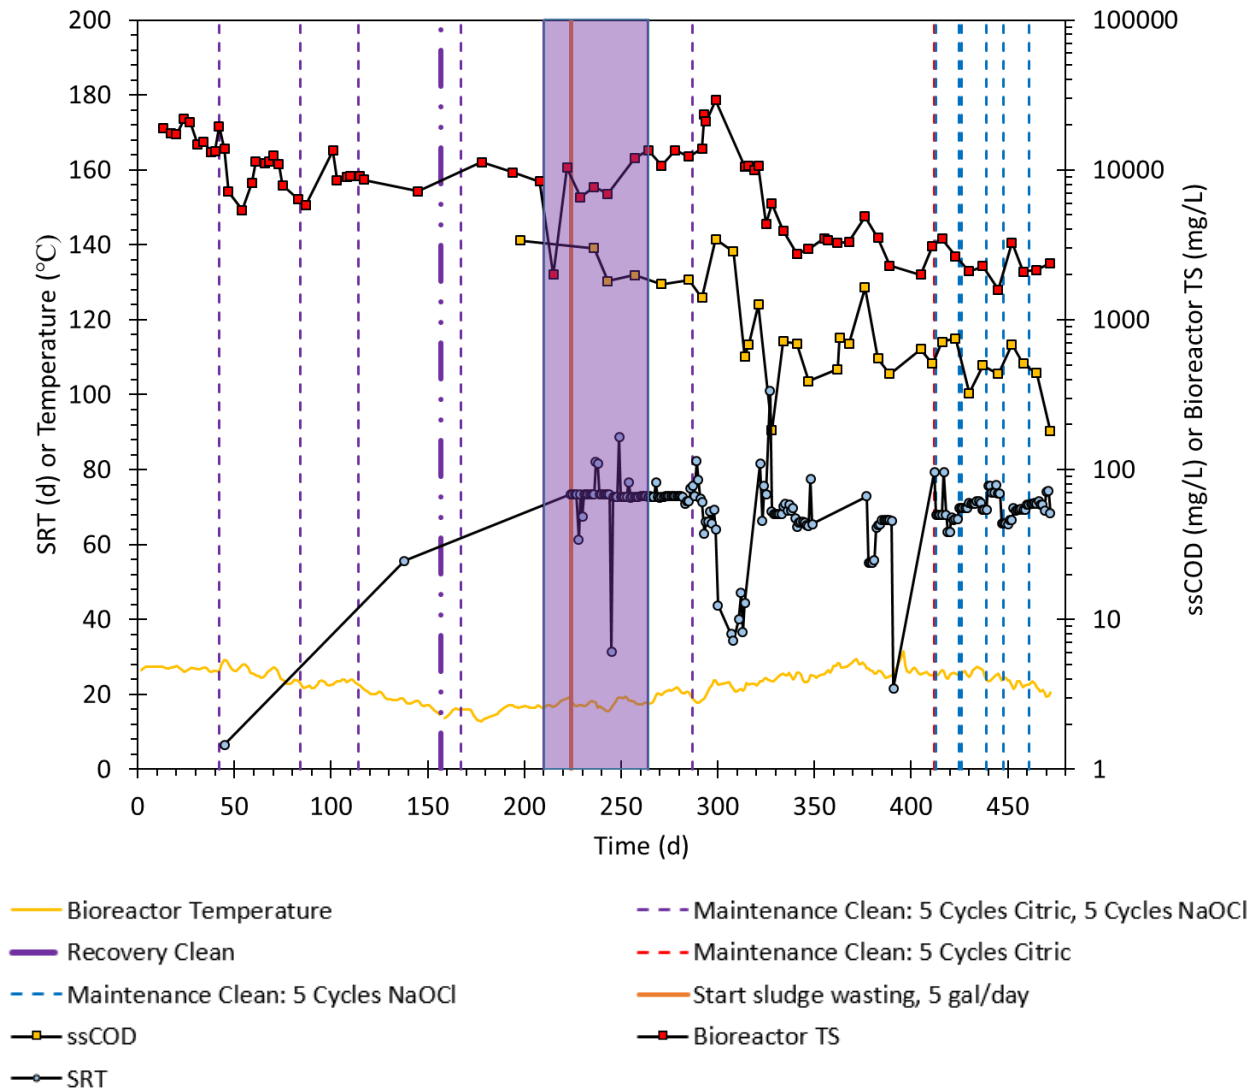

**Figure S2.** Plot of bioreactor total solids, semi-soluble chemical oxygen demand, temperature, solids retention time, with chemical cleaning events and sludge wasting over the study's entire duration.

**Table S3.** Table of LSI and pH values over the first 96 days of operation. The LSI values were consistently negative after the startup period, indicating that calcium carbonate scaling was not likely to occur.

| <b>Days</b> | <b>LSI</b> | <b>pH</b> |
|-------------|------------|-----------|
| 17          | -0.07      | 7.05      |
| 20          | 0.19       | 7.34      |
| 24          | 0.24       | 7.44      |
| 27          | -0.39      | 6.76      |
| 31          | -0.26      | 6.95      |
| 34          | 0.01       | 7.10      |
| 38          | -0.22      | 7.01      |
| 40          | -0.46      | 6.77      |
| 47          | -0.24      | 6.92      |
| 54          | -0.29      | 6.88      |
| 59          | -0.30      | 6.97      |
| 61          | -0.78      | 6.67      |
| 66          | -0.56      | 6.63      |
| 68          | -0.51      | 6.68      |
| 83          | -0.19      | 7.06      |
| 87          | -0.20      | 7.07      |
| 96          | -0.05      | 7.10      |

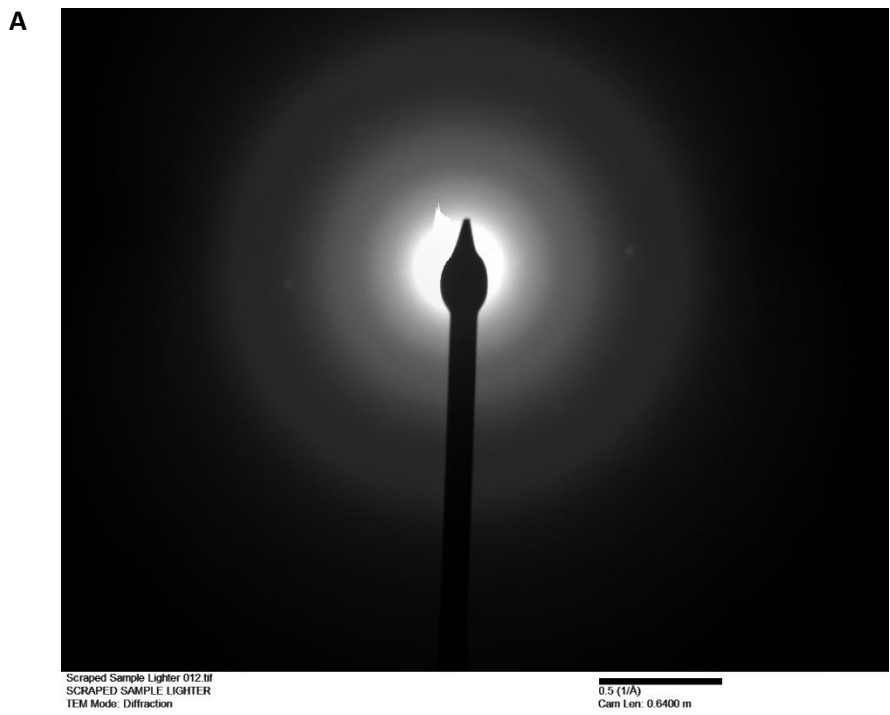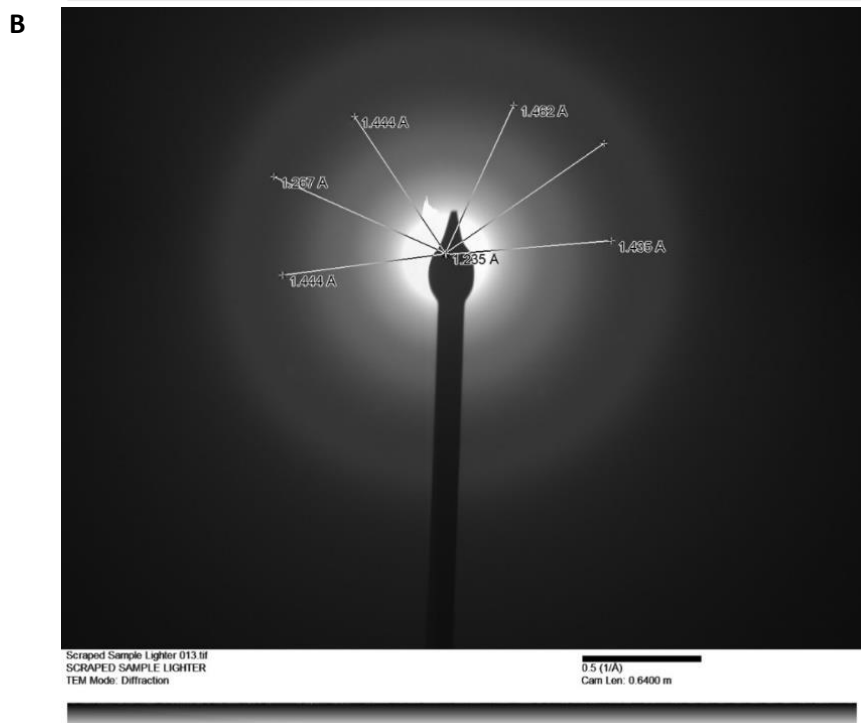

**Figure S3.** Transmission electron microscope crystal diffraction images taken of Figure 5B. The diffraction patterns are diffused due to the high organic content present throughout the wastewater matrix, but diffraction spots can be seen in (A). Measurements to determine d-spacing are shown in (B).

A

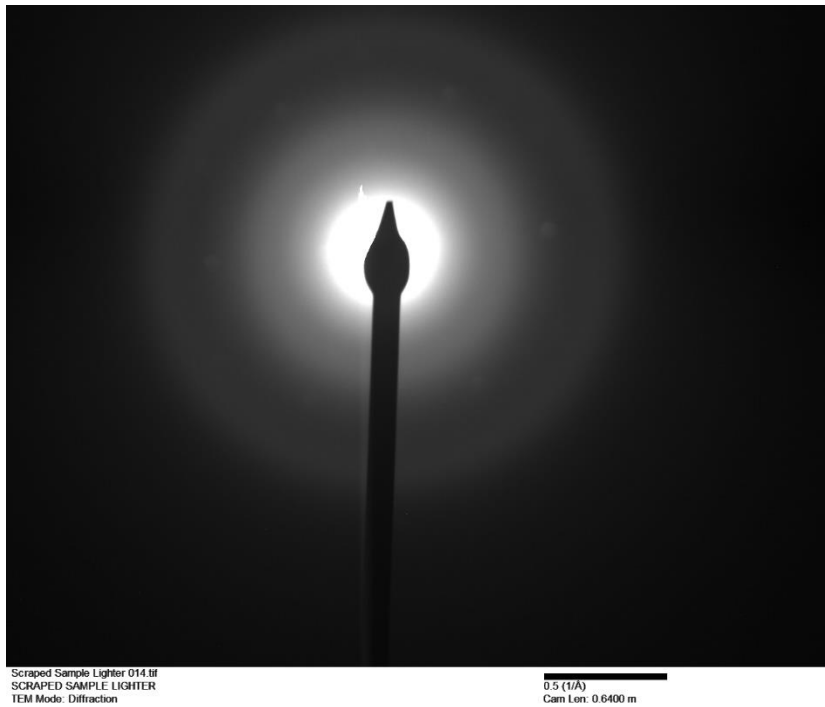

B

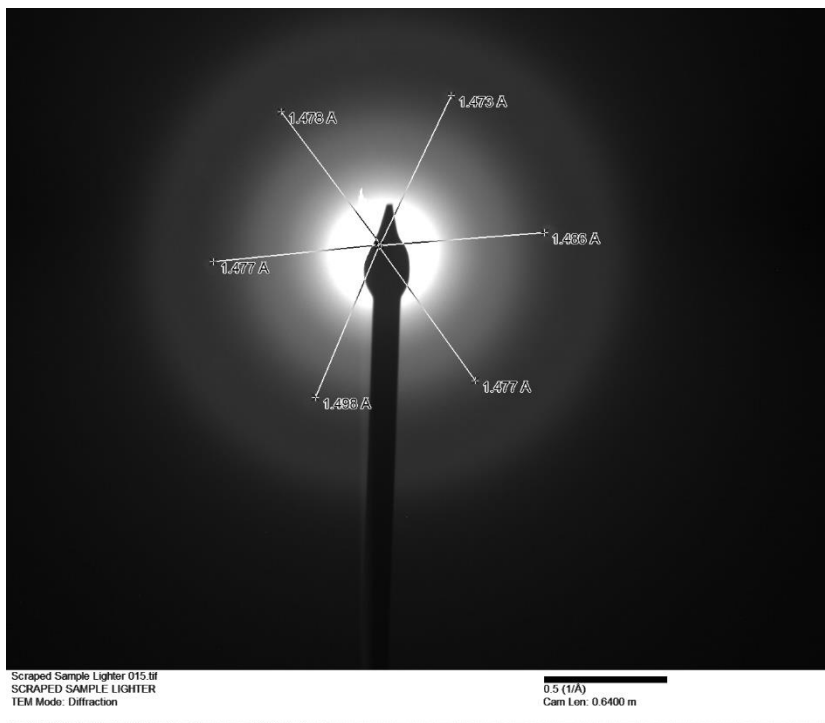

**Figure S4.** Transmission electron microscope crystal diffraction images taken of Figure 5C. The diffraction patterns are diffused due to the high organic content present throughout the wastewater matrix, but diffraction spots can be seen in (A). Measurements to determine d-spacing are shown in (B).
